# Supplementary material for: The application of deep learning in early enamel demineralization detection
Source: PeerJ. 2025 Jan 2;13:e18593. doi: 10.7717/peerj.18593 (PMC11700490; doi:10.7717/peerj.18593)
Supplement: Supplemental Information 6 [file peerj-13-18593-s006.xlsx]

## Sheet: Sheet1
"11"	0.9631878025009498,
"12"	0.9392191780821918,
"13"	0.9211268732867804,
"14"	0.905443401000956,
"21"	0.9567565265533836,
"22"	0.9366434036828386,
"23"	0.9414360830962848,
"24"	0.8900676054832589,
"41"	0.9323823975720789,
"42"	0.9207843632840473,
"43"	0.9104035065102488,
"44"	0.8991940870029832,
"45"	0.8693298879072529,
"31"	0.9181311018131102,
"32"	0.9419348695486573,
"33"	0.8920696645017168,
"34"	0.8597935516757996,
"35"	0.9207136101236097,
"25"	0.779373551513449,
"26"	0.9355418656242526,
"36"	0.8677464893379895,
"16"	0.9239567138217138,
"15"	0.9197275837583113,
"46"	0.910307
"11"	0.9257322993287075,
"12"	0.9444114709245935,
"13"	0.922221513469839,
"14"	0.8629831246597713,
"21"	0.9369342457817366,
"22"	0.9397055768260469,
"23"	0.8980972613494665,
"24"	0.8678466617754952,
"41"	0.9085927913016181,
"42"	0.8996985357450473,
"43"	0.8853986345865832,
"44"	0.8521536157843742,
"31"	0.8820216281165515,
"32"	0.8977229498396826,
"33"	0.8377976651286656,
"34"	0.7945700084404014,
"26"	0.9205458196422052,
"36"	0.9251008742434432,
"16"	0.9455719557195572,
"46"	0.922727
"11"	0.9216224075194707,
"12"	0.8642883024337218,
"13"	0.8657114789345888,
"14"	0.7908302265557786,
"16"	0.7704178814382896,
"21"	0.708256880733945,
"22"	0.9326623766384232,
"23"	0.8940314788842139,
"24"	0.8952603492374246,
"26"	0.6110709640121404,
"31"	0.9116203239214562,
"32"	0.8985738596147764,
"33"	0.8988777459407832,
"34"	0.8761602034329307,
"36"	0.7102834219366622,
"41"	0.8722217874471748,
"42"	0.8762009803921569,
"43"	0.8423590338854413,
"44"	0.8095699282709361,
"45"	0.8504294020376594,
"46"	0.772093023255814,
"11"	0.964482134145934,
"12"	0.9526400040019009,
"13"	0.9567704608983943,
"14"	0.9401488554978233,
"15"	0.9073502484959456,
"21"	0.9684489420423184,
"22"	0.949230418424353,
"23"	0.9243595940067666,
"24"	0.92704587447599,
"25"	0.8623016656791099,
"26"	0.8919902353645618,
"31"	0.9014319437965593,
"32"	0.9589066136953581,
"33"	0.9620865056084725,
"34"	0.9120841867363514,
"35"	0.8870791130577608,
"36"	0.8866869477038969,
"41"	0.9268355655962562,
"42"	0.9534157592493803,
"43"	0.9342834180085536,
"44"	0.849468193211842,
"45"	0.817754417474446,
"16"	0.9482598226989165,
"46"	0.956247
"11"	0.9505277044854882,
"12"	0.9546309457150651,
"13"	0.9467258231310671,
"14"	0.8827686871014827,
"15"	0.8133647097009779,
"16"	0.8671895843338135,
"21"	0.9657807139579433,
"22"	0.9269620705372211,
"23"	0.9485128421385554,
"24"	0.9152172365517405,
"25"	0.8172899306268215,
"26"	0.8375572837105958,
"31"	0.919246159803795,
"32"	0.914934034736139,
"33"	0.940762019370742,
"34"	0.8864286871523465,
"35"	0.8862355446081911,
"36"	0.6986039639272431,
"41"	0.9176875703595788,
"42"	0.9057069864662289,
"43"	0.9193492126768985,
"44"	0.9256489475355875,
"45"	0.8749332478906333,
"46"	0.782854
"11"	0.9029201775772929,
"12"	0.9592744135297326,
"13"	0.9444754792426202,
"14"	0.9219047619047619,
"16"	0.9144298099366456,
"21"	0.9470567323616373,
"22"	0.9053815175640293,
"23"	0.9198256541407142,
"24"	0.8807401231400719,
"26"	0.8645643824540126,
"31"	0.9409456021020771,
"32"	0.8987778822322878,
"33"	0.9341980209090401,
"34"	0.841745489229791,
"36"	0.8297550364135061,
"41"	0.9204828077986678,
"42"	0.9207141588203944,
"43"	0.9389057963409941,
"44"	0.9063036429525081,
"46"	0.880972
"21"	0.9628522823337867,
"22"	0.9581240240070742,
"23"	0.9593947501524469,
"24"	0.936099753618453,
"26"	0.9180699222195493,
"31"	0.9308377773360185,
"32"	0.9492378037144188,
"33"	0.9469442612973576,
"34"	0.9563087643477575,
"36"	0.9155840040560238,
"11"	0.9617010554606792,
"12"	0.9542491425067545,
"13"	0.9713340683572216,
"14"	0.9402263338247799,
"15"	0.9531135601710917,
"41"	0.9467421762582361,
"42"	0.9403045106183818,
"43"	0.960430150613692,
"44"	0.9551821694728125,
"46"	0.96938
"11"	0.9557824919724167,
"12"	0.9285092688373315,
"13"	0.9466794582107828,
"14"	0.9306955269820781,
"15"	0.8723940435280642,
"16"	0.841100907691491,
"21"	0.9544509078089194,
"22"	0.9415103886657601,
"23"	0.9261816250663835,
"24"	0.9383399209486166,
"25"	0.8873289371055804,
"26"	0.9268381949273505,
"31"	0.9275386725046311,
"32"	0.9231080370505198,
"33"	0.9115675256733191,
"34"	0.8836831257801387,
"35"	0.8794256120527307,
"36"	0.5950472216121239,
"42"	0.959500546597431,
"43"	0.9236002695107722,
"44"	0.8957912331911284,
"45"	0.868482058314559,
"46"	0.6496040830112207,
"41"	0.922802
"11"	0.9463866029131149,
"12"	0.9372761951312811,
"13"	0.9284463081904559,
"14"	0.9346575036316906,
"15"	0.8920371765887968,
"16"	0.8647151437401598,
"21"	0.9692086767019296,
"22"	0.9523794016760019,
"23"	0.9509260434739678,
"24"	0.9390390390390391,
"25"	0.8442198293376676,
"26"	0.892830845438115,
"31"	0.9257502810851328,
"32"	0.9507191665569261,
"33"	0.9311743921427715,
"34"	0.9311597228020373,
"35"	0.8957114026236125,
"36"	0.8701854493580599,
"41"	0.8879257703707013,
"42"	0.9251125064000647,
"43"	0.9537884974335045,
"44"	0.9104186564788284,
"45"	0.8632500317138145,
"46"	0.785601
"11"	0.9331742243436754,
"13"	0.9253332785571966,
"14"	0.8871342954025708,
"15"	0.8673694668285683,
"16"	0.8534596400870659,
"21"	0.9295222071091054,
"22"	0.9527787417579694,
"23"	0.9074684323991377,
"24"	0.8740477895696335,
"25"	0.7662655317483612,
"31"	0.8606329244407793,
"32"	0.892257054734613,
"33"	0.9049581194271819,
"34"	0.8908859990612662,
"36"	0.8091345020045594,
"41"	0.8496339756701475,
"42"	0.9115858281247368,
"43"	0.9180817921521313,
"44"	0.8543499916984891,
"46"	0.8193933614857195,
"26"	0.9230266253079972,
"11"	0.9479315321416766,
"12"	0.9259954269494599,
"13"	0.9323572661594527,
"14"	0.9376685294462465,
"15"	0.8218457943925234,
"21"	0.9572214977726823,
"22"	0.9538821727798802,
"23"	0.9251203125744508,
"24"	0.93538487409089,
"25"	0.9250785105428443,
"31"	0.8771322303450045,
"32"	0.8419030319966466,
"33"	0.7381920903954802,
"34"	0.9172847921093781,
"35"	0.8364545310268211,
"36"	0.863779764140314,
"41"	0.9047920541331962,
"42"	0.829973602111831,
"43"	0.9413330155703845,
"44"	0.8864519824870085,
"45"	0.8264462809917356,
"46"	0.8996057368150392,
"26"	0.9272034639243932,
"16"	0.944692
"11"	0.9576264630143345,
"12"	0.9445930025992483,
"13"	0.9192037763180899,
"14"	0.8598971272612758,
"15"	0.8903305785123967,
"21"	0.9646317776290232,
"22"	0.9456113199204068,
"23"	0.9496322422469784,
"24"	0.9377390897025529,
"25"	0.856837749449376,
"31"	0.8420256064138749,
"32"	0.9061179577464789,
"33"	0.902336212782379,
"34"	0.8770006751658128,
"35"	0.8972041202438512,
"36"	0.5448834392976082,
"41"	0.8600295515354818,
"42"	0.9388934456789203,
"43"	0.9066786272353724,
"44"	0.8766471665780299,
"45"	0.887756458545664,
"46"	0.6210026385224274,
"26"	0.9272100964214263,
"16"	0.886936
"11"	0.9229851547529396,
"12"	0.9201289398280802,
"13"	0.9088824655763297,
"14"	0.8301636194082572,
"15"	0.8987565858798735,
"16"	0.8784250864098583,
"21"	0.9130402637921602,
"22"	0.8721613484504236,
"23"	0.8805749182653754,
"24"	0.8308839247541685,
"25"	0.8104842070172514,
"26"	0.8007718989691729,
"31"	0.8397155296851345,
"32"	0.9008363067433562,
"33"	0.8952301512391071,
"34"	0.8679414209886807,
"35"	0.8527997023572245,
"36"	0.6170995866895949,
"41"	0.8849549319924925,
"42"	0.9075683982635422,
"43"	0.9293317648409032,
"44"	0.89808468072546,
"45"	0.8417509382072363,
"46"	0.8476900866217517,
"11"	0.959152935754144,
"12"	0.9497215613827568,
"13"	0.931422569027611,
"14"	0.9395580196378145,
"15"	0.8181735201496965,
"16"	0.7874298863799799,
"17"	0.8480260636259103,
"21"	0.9494550006777607,
"22"	0.9364691753402722,
"23"	0.9283346900802419,
"24"	0.9281939179280002,
"35"	0.8191988067334328,
"36"	0.7391014022703425,
"37"	0.883289124668435,
"41"	0.8937583001328021,
"42"	0.9214172808079979,
"43"	0.9497452439426707,
"44"	0.9463504049026045,
"45"	0.8812037182921065,
"46"	0.8854470802919708,
"47"	0.9241086587436332,
"31"	0.8801695464044977,
"32"	0.8791273010616538,
"33"	0.938844981203564,
"34"	0.9146969265482267,
"26"	0.95349
"11"	0.9568418630641291,
"12"	0.8951819647435051,
"13"	0.8852096854717924,
"14"	0.8532562791731496,
"15"	0.9241214057507987,
"21"	0.9484306214624664,
"22"	0.9389033942558747,
"23"	0.8945637652861987,
"24"	0.8348359342821838,
"25"	0.9150218794944766,
"32"	0.8400514579759862,
"33"	0.9007405424696645,
"34"	0.9139182201364446,
"35"	0.8516077560789482,
"43"	0.7083980762116168,
"44"	0.7745617017143412,
"45"	0.7126302235748566,
"26"	0.9482251500866272,
"16"	0.918065508327607,
"46"	0.924989
"11"	0.9517682285344339,
"12"	0.9406816724007231,
"13"	0.9303821686516478,
"14"	0.8539483304898855,
"15"	0.8072608289186662,
"16"	0.624868282402529,
"21"	0.9270457697642164,
"22"	0.9457325527653674,
"23"	0.932924472389002,
"24"	0.9115232443125618,
"25"	0.8902425758729469,
"26"	0.8592824410416899,
"41"	0.8672834093300597,
"42"	0.9401117448492609,
"43"	0.8909561598761251,
"44"	0.8657316503038803,
"31"	0.9320561047444085,
"32"	0.9371899620659468,
"33"	0.9324814416048054,
"34"	0.9010921531646124,
"35"	0.8584723229393281,
"36"	0.8529102910291029,
"45"	0.8828087167070218,
"46"	0.8074156470152021,
"11"	0.9548394906675343,
"12"	0.9420840678623991,
"13"	0.9632644838659983,
"14"	0.9074832272492689,
"15"	0.9082367053178728,
"16"	0.9281673175895171,
"21"	0.9583412017977868,
"22"	0.9475414447198636,
"23"	0.9560662747194014,
"24"	0.8767772511848341,
"25"	0.9302852435382556,
"26"	0.9237956558670064,
"31"	0.8945295243704904,
"32"	0.9047119648212545,
"33"	0.9323568847578574,
"34"	0.9126709545591752,
"35"	0.9102945048331892,
"36"	0.8999889815256914,
"41"	0.9326947025577162,
"42"	0.9286186491236557,
"43"	0.9472814194653221,
"44"	0.9041735800893427,
"45"	0.9161528976572133,
"46"	0.9091657432325471,
"11"	0.9361705831157529,
"12"	0.9394291952140877,
"13"	0.9248553586187896,
"14"	0.8885021060326522,
"21"	0.9170934195578083,
"15"	0.886353889698945,
"41"	0.950785190994813,
"42"	0.9333075812031844,
"43"	0.9172121971120093,
"44"	0.9242751180040458,
"45"	0.7334338544559955,
"46"	0.8384429205324728,
"31"	0.9150868736285478,
"32"	0.9136219013321213,
"33"	0.9328736332812678,
"22"	0.9475446253969744,
"23"	0.847564551024122,
"24"	0.8783908118912402,
"34"	0.9374704890387858,
"35"	0.8819298491429639,
"36"	0.5827199382854938,
"25"	0.9378061145577343,
"26"	0.9317333897811764,
"16"	0.9132901326876973,
	0.903416
