# Supplementary material for: The application of deep learning in early enamel demineralization detection
Source: PeerJ. 2025 Jan 2;13:e18593. doi: 10.7717/peerj.18593 (PMC11700490; doi:10.7717/peerj.18593)
Supplement: Supplemental Information 7 [file peerj-13-18593-s007.xlsx]

## Sheet: training
您的姓名	Sex	year
	male	24
	male	15
	female	25
	male	22
	male	19
	female	23
	male	27
	female	29
	female	30
	female	28
	female	26
	female	32
	female	57
	male	30
	female	23
	female	29
	female	31
	female	27
	female	29
	female	19
	female	21
	female	17
	male	14
	male	28
	male	25
	male	14
	female	22
	female	30
	female	28
	female	33
	female	40
	male	17
	male	24
	female	15
	male	16
	female	29
	male	20
	male	14
	male	41
	female	19
	male	16
	female	28
	female	14
	female	15
	female	15
	female	15
	male	15
	female	41
	female	14
	male	30
	female	15
	female	24
	male	15
	male	24
	female	28
	female	29
	male	22
	female	19
	female	19
	female	33
	female	26
	female	25
	female	26
	female	19
	female	18
	female	27
	female	33
	male	27
	female	16
	female	28
	male	20
	female	30
	female	31
	female	34
	male	31
	male	34
	female	16
	female	22
	female	22
	female	25
	female	27
	female	36
	female	37
	male	19
	female	38
	female	37
	female	22
	male	17
	female	56
	female	34
	female	26
	male	29
	female	30
	female	35
	female	21
	male	19
	male	24
	female	17
	male	20
	female	16
	male	27
	male	22
	female	24
	female	23
	female	28
	female	35
	female	24
	female	24
	female	40
	female	36
	male	18
	female	26
	female	14
	female	38
	female	22
	female	33
	male	54
	female	41
	male	31
	female	42
	female	17
	female	31
	female	29
	female	14
	female	27
	female	22
	female	23
	female	33
	male	23
	male	30
	female	21
	female	34
	female	26
	female	24
	female	23
	female	16
	female	21
	female	27
	male	20
	female	24
	male	23
	female	41
	female	27
	female	41
	female	27
	male	31
	male	47

## Sheet: validation
validatin set
姓名	Sex	year
	male	15
	female	14
	male	15
	female	23
	female	34
	female	24
	male	22
	female	32
	female	28
	male	14
	male	20
	male	18
	female	26
	male	29
	female	28
	male	18
	female	41
	female	20
	female	27
	female	26
	female	22
	female	30
	female	24
	female	28
	female	29
	male	29
	female	34
	female	22
	male	26
	female	34
	male	26
	female	19
	female	18
	female	16
	female	23
	female	22
	female	39
	male	23
	male	26
	female	32

## Sheet: test
test set
名字	sex	year
	female	20
	male	17
	female	25
	female	34
	female	25
	female	20
	male	27
	female	31
	male	15
	female	23
	female	24
	female	32
	male	14
	female	25
	female	30
	male	25
	female	23
	female	17
	female	31
	female	22
